# Supplementary material
Source: publisher site journal article supplement (https://www.spandidos-publications.com/5430/downloadSupplementary)
Supplement: Supplementary file 1 [file downloadSupplementary]

## Sheet: Sheet1
Table SI. HBV expression data in HepG2.2.15-GFP and HepG2.2.15-ATOH8 cells
HepG2.2.15 GFP HBV Intra	HepG2.2.15 ATOH8 Intra	LOG(HepG2.2.15 GFP HBV Intra）	LOG(HepG2.2.15 ATOH8 Intra）	HepG2.2.15 GFP HBV Extra	HepG2.2.15 ATOH8 HBV Extra	LOG(HepG2.2.15 GFP HBV Extra)	LOG(HepG2.2.15 ATOH8 HBV Extra)
9.91293e+08	1.33463e+09	8.9962	9.12536	428986	389547	5.63244	5.59056
5.27225e+09	2.45147e+10	9.722	10.3894	1.42421e+07	5.34764e+07	7.15358	7.72816
5.76775e+09	2.41191e+10	9.76101	10.3824	1.40448e+07	6.53479e+07	7.14752	7.81523
5.97495e+09	2.32676e+10	9.77633	10.3668	1.68172e+07	4.54286e+07	7.22575	7.65733
2.74264e+09	2.61057e+10	9.43817	10.4167	1.27565e+08	3.04584e+08	8.10573	8.48371
6.90429e+09	1.33241e+10	9.83912	10.1246	7.0211e+08	7.49026e+08	8.84641	8.8745
6.62593e+09	2.24835e+10	9.82125	10.3519	8.13856e+08	3.37684e+09	8.91055	9.52851
5.17806e+09	1.58547e+10	9.71417	10.2002	1.0167e+09	1.18767e+09	9.00719	9.07469
1.9472e+09	1.26613e+10	9.28941	10.1025	1.35406e+09	1.17772e+09	9.13164	9.07104
6.72918e+09	1.77175e+10	9.82796	10.2484	1.20418e+09	1.09683e+09	9.08069	9.04014
5.17742e+09	1.75406e+10	9.71411	10.244	7.20811e+08	1.45542e+09	8.85782	9.16299
4.494e+09	1.84125e+10	9.65263	10.2651	6.35563e+08	1.35556e+09	8.80316	9.13212
6.62376e+09	3.89806e+10	9.8211	10.5908	6.6446e+08	1.25866e+09	8.82247	9.09991
3.63046e+09	1.64832e+10	9.55996	10.217	5.21076e+08	1.07036e+09	8.7169	9.02953
5.49291e+09	1.91797e+10	9.7398	10.2828
3.2291e+09	2.47726e+10	9.50908	10.394
6.33556e+09	2.01602e+10	9.80178	10.3045
4.92881e+09	1.78764e+10	9.69274	10.2523
5.51697e+09	2.66688e+10	9.7417	10.426
8.06643e+07	4.94929e+07	7.90668	7.69454
7.40552e+07	6.05944e+07	7.86956	7.78243
8.41568e+07	5.98967e+07	7.92509	7.7774
7.50763e+07	5.91944e+07	7.8755	7.77228
6.09832e+07	2.72748e+07	7.78521	7.43576
1.09766e+07	8.22142e+07	7.04047	7.91495
9.71768e+08	5.52728e+08	8.98756	8.74251
7.42033e+08	4.41912e+08	8.87042	8.64534
9.36259e+08	7.71391e+08	8.9714	8.88727
